# DNA Aptamers against Exon v10 of CD44 Inhibit Breast Cancer Cell Migration

Joji Iida<sup>1\*</sup>, Rebecca Clancy<sup>1</sup>, Jesse Dorchak<sup>1</sup>, Richard I. Somiari<sup>2</sup>, Stella Somiari<sup>1</sup>, Mary Lou Cutler<sup>3</sup>, Richard J. Mural<sup>4</sup>, Craig D. Shriver<sup>5</sup>

**1** Department of Cell Biology, Windber Research Institute, Windber, Pennsylvania, United States of America, **2** ITSI-Biosciences, Johnstown, Pennsylvania, United States of America, **3** Department of Pathology, Uniformed Services University of the Health Science, Bethesda, Maryland, United States of America, **4** Windber Research Institute, Windber, Pennsylvania, United States of America, **5** Department of Surgery, Walter-Reed Army Medical Center, Bethesda, Maryland, United States of America

## Abstract

CD44 adhesion molecules are expressed in many breast cancer cells and have been demonstrated to play a key role in regulating malignant phenotypes such as growth, migration, and invasion. CD44 is an integral transmembrane protein encoded by a single 20-exon gene. The diversity of the biological functions of CD44 is the result of the various splicing variants of these exons. Previous studies suggest that exon v10 of CD44 plays a key role in promoting cancer invasion and metastasis, however, the molecular mechanisms are not clear. Given the fact that exon v10 is in the ectodomain of CD44, we hypothesized that CD44 forms a molecular complex with other cell surface molecules through exon v10 in order to promote migration of breast cancer cells. In order to test this hypothesis, we selected DNA aptamers that specifically bound to CD44 exon v10 using Systematic Evolution of Ligands by Exponential Enrichment (SELEX). We selected aptamers that inhibited migration of breast cancer cells. Co-immunoprecipitation studies demonstrated that EphA2 was co-precipitated with CD44. Pull-down studies demonstrated that recombinant CD44 exon v10 bound to EphA2 and more importantly aptamers that inhibited migration also prevented the binding of EphA2 to exon v10. These results suggest that CD44 forms a molecular complex with EphA2 on the breast cancer cell surface and this complex plays a key role in enhancing breast cancer migration. These results provide insight not only for characterizing mechanisms of breast cancer migration but also for developing target-specific therapy for breast cancers and possibly other cancer types expressing CD44 exon v10.

**Citation:** Iida J, Clancy R, Dorchak J, Somiari RI, Somiari S, et al. (2014) DNA Aptamers against Exon v10 of CD44 Inhibit Breast Cancer Cell Migration. *PLoS ONE* 9(2): e88712. doi:10.1371/journal.pone.0088712

**Editor:** Yulia Komarova, University of Illinois at Chicago, United States of America

**Received:** October 1, 2013; **Accepted:** January 10, 2014; **Published:** February 19, 2014

**Copyright:** © 2014 Iida et al. This is an open-access article distributed under the terms of the Creative Commons Attribution License, which permits unrestricted use, distribution, and reproduction in any medium, provided the original author and source are credited.

**Funding:** This research was supported by a grant from the United States Department of Defense (Military Molecular Medicine Initiative MDA W81XWHH-05-2-0075, Protocol 01-20006) and USMCI (MDA-905-02-2-0005). The funders had no role in study design, data collection and analysis, decision to publish, or preparation of the manuscript. The opinion and assertions contained herein are the private views of the authors and are not to be construed as official or as representing the views of the Department of the Army or the Department of Defense.

**Competing Interests:** Dr. Richard Somiari is employed by ITSI-Biosciences, which is a commercial company. This does not alter the authors' adherence to all the PLOS ONE policies on sharing data and materials.

\* E-mail: g.iida@wriwindber.org

## Introduction

Enhanced migration into the surrounding tissues is one of the hallmarks of the malignancy of tumor cells. To successfully metastasize, a cancer cell has to detach from the primary tumor, invade into surrounding tissues, and intravasate into blood or lymphatic vessels. These processes are composed of complex mechanisms involving tumor recognition and degradation of extracellular matrix (ECM) proteins and migration into tissue. In order to develop effective therapeutic strategies for breast cancer, it is important to characterize mechanisms of tumor-ECM interaction.

Agents able to bind tightly and selectively to disease markers can greatly benefit disease diagnosis and therapy. Aptamers are functional molecules, usually DNA or RNA oligonucleotides, with the appropriate sequence and structure that allow them to form a complex with a target molecule. Aptamers are evolved by an iterative selection method called SELEX (systematic evolution of ligands by exponential enrichment) to specifically recognize and tightly bind their targets by means of well-defined complementary three-dimensional structures [1,2]. They have been developed

against intracellular and extracellular molecules expressed in cancer cells and demonstrated to attenuate the biological functions of their target molecules [3,4,5,6,7,8,9,10]. Furthermore, DNA aptamers developed against MUC1 have been applied as tools for diagnosis of epithelial tumors as well as imaging of tumor cells in vivo [1,11,12,13]. Thus, aptamers have a great impact for the next generation of strategies for cancer detection, diagnosis, and therapy. Indeed, aptamers against VEGF165, Pegaptanib (brand name Macugen), is an effective therapy for age-related macular degeneration (AMD) [14,15,16]. Moreover, Phase II trial of AS1411, aptamer targeting nucleolin, demonstrated its efficacy in renal cell carcinoma patients [17], suggesting that DNA aptamers represent a novel therapeutic strategy for cancer therapy.

CD44 is an integral transmembrane protein encoded by a single 20-exon gene. In the standard form (CD44s), 10 of the 20 exons are translated. Multiple variant isoforms exist (CD44v1-10) which arise from alternate mRNA splicing of the remaining 10 exons [18]. In contrast to the ubiquitous expression of CD44s, splice variants are highly restricted in their expression in normal or malignant tissues. Indeed, previous studies demonstrated that exon v10 plays a role in promoting breast tumor development and

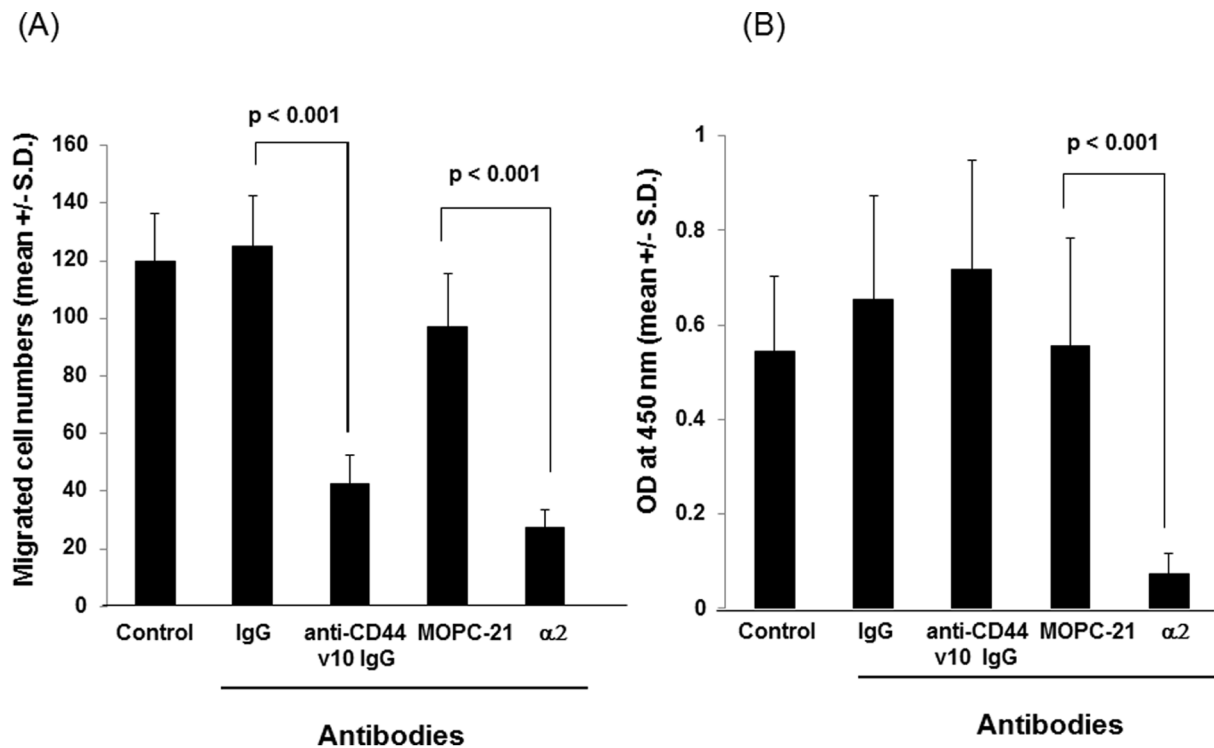

**Figure 1. Inhibition of migration of HCC38 cells with anti-CD44 exon v10 antibody.** (A) Cells were harvested, washed, and resuspended in RPMI1640-serum free media. Migration assays were performed using type I collagen (10  $\mu\text{g}/\text{ml}$ ) as an adhesive substrate in the lower compartment of Transwell by incubating at 37°C for 4 hours. The antibodies were added in both upper and lower chambers at a concentration of 5  $\mu\text{g}/\text{ml}$ . Experiments were performed by triplicates three times. Statistical significance was calculated by Student's two-tailed paired *t*-test. (B) Cells were harvested, washed, resuspended in RPMI1640 containing 1 mg/ml BSA (adhesion buffer) at a concentration of  $10^5$  cell/ml. Cells (100  $\mu\text{l}/\text{well}$ ) were incubated on plates coated with type I collagen (5  $\mu\text{g}/\text{ml}$ ) for 1 hour in the presence or absence of antibodies (5  $\mu\text{g}/\text{ml}$ ). Plates were washed, fixed followed by staining with crystal violet. After extensive washing to remove excess dye, cells were lysed with 100  $\mu\text{l}$  of PBS containing 2% SDS and then the absorbance was measured at 550 nm. Experiments were performed in quadruplicates and repeated three times. The representative data were shown as mean +/- S.D. of absorbance values. doi:10.1371/journal.pone.0088712.g001

progression [19,20]. High-level expression of this exon, v10, was also reported in malignant renal cell carcinoma cells [21]. Although the mechanisms by which exon v10 facilitates these processes are not entirely clear, it is possible that this exon stimulates migration, adhesion, and growth in microenvironments through mediating the interaction with ECM directly or indirectly by forming molecular complexes with other cell surface molecules. Importantly, previous studies using peripheral blood stem cells suggest that exon v10 plays a key role in promoting leukocytes adhesion to bone marrow cells and migration to disease sites in mice [22,23,24]. Thus, as an analogy, it is plausible to suspect that exon v10 of CD44 expressed on cancer cells could play a key role in promoting metastasis by possibly mediating cell adhesion and migration at secondary sites. Therefore, the development of small molecules (i.e. DNA aptamer) that specifically recognize and antagonize the biological functions of exon v10 of CD44 would be a promising approach for treatment of TN breast cancer patients.

In this study, we utilized the SELEX approach to develop DNA aptamers that specifically recognize CD44 exon v10. These aptamers significantly inhibited migration of breast cancer cells. Pull-down assays suggest that the exon interacted with EphA2 and the interaction was inhibited by the aptamers. Given the fact that EphA2 plays a key role in promoting tumor invasion and metastasis, our results suggest a novel model of a molecular complex consisting of CD44 and EphA2 that facilitates TN breast cancer progression.

## Materials and Methods

### Cell Lines

All cell lines used in this study (HCC38, SK-Br3, MCF-7, MDA-MB-231, and HCC1806) were purchased from ATCC and maintained in RPMI1640 supplemented with 10% FBS.

### Antibodies and Chemicals

MOPC-21 (IgG<sub>1</sub>), pFLAG-CTC vector, and Streptavidin-FITC were purchased from Sigma-Aldrich (St. Louis, MO, USA). Anti-CD44 (clone 156-3C11) and anti- $\alpha 2$  integrin subunit (clone PIE6, IgG1) antibodies were purchased from Millipore (Billerica, MA, USA). FITC-conjugated goat anti-mouse IgG, FITC-conjugated goat anti-rabbit IgG, HRP-conjugated rabbit anti-mouse IgG, HRP-conjugated rat anti-rabbit IgG, and HRP-conjugated Streptavidin were purchased from Jackson ImmunoResearch (West Grove, PA, USA). Anti-CD44v10 antibody (AB2082) was purchased from Calbiochem (San Diego, CA, USA). Anti-FLAG (M2) antibody was purchased from Stratagene (Santa Clara, CA, USA). Type I Collagen was purchased from Inamed BiomatenaK (Freemont, CA, USA). Enhanced chemiluminescence (ECL) reagents were purchased from GE Healthcare (Piscataway, NJ, USA). Other chemicals were purchased from Sigma-Aldrich unless otherwise mentioned.



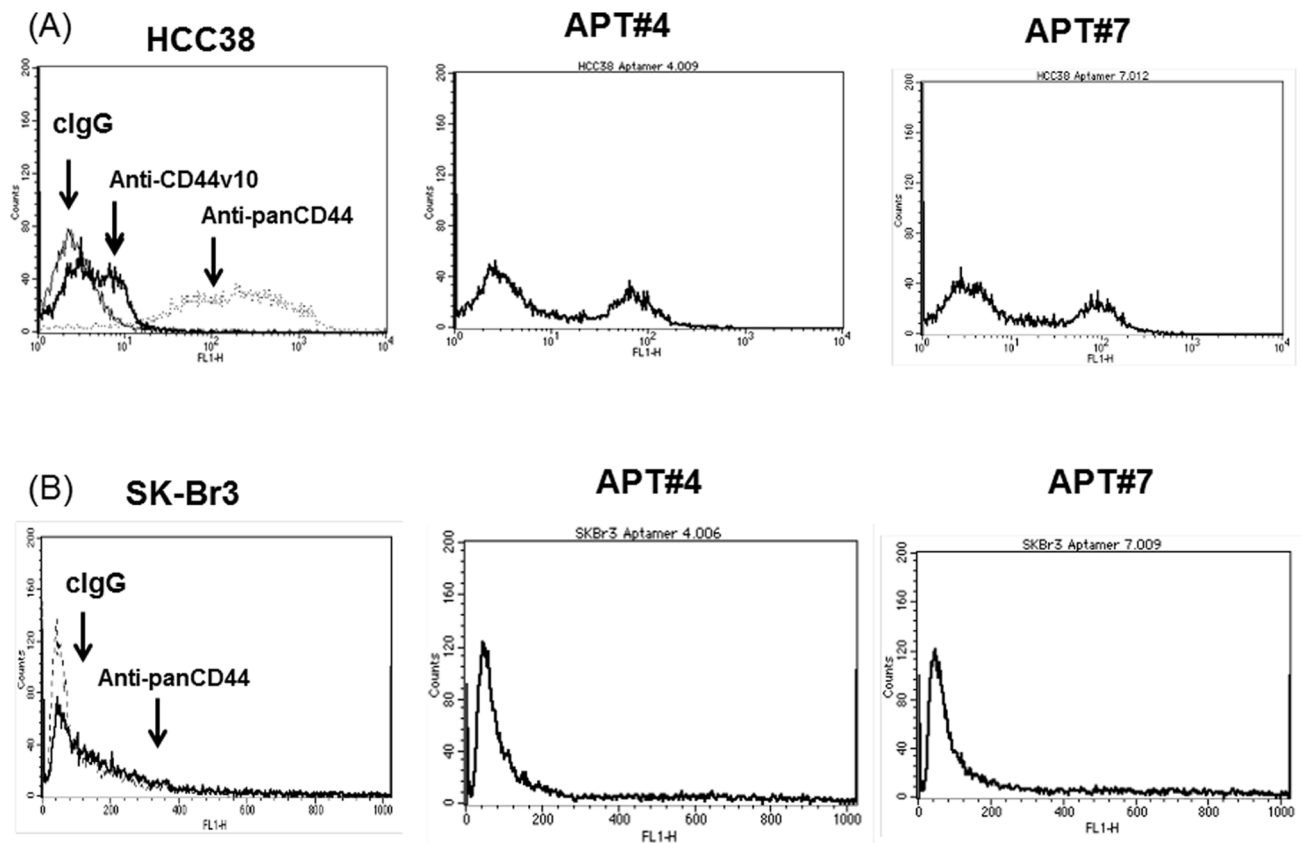

**Figure 3. FACS analysis of aptamers against CD44 exon v10.** HCC38 or SK-Br3 cells were harvested and resuspended in RPMI1640 containing 1 mg/ml BSA and 0.025%  $\text{NaN}_3$  (FACS buffer). Cells were incubated with aptamers of which 5'-end was conjugated to biotin (5  $\mu\text{g}/\text{ml}$ ), anti-panCD44 (clone 156-3C11) (5  $\mu\text{g}/\text{ml}$ ), or anti-CD44 exon v10 antibody (AB2082) (5  $\mu\text{g}/\text{ml}$ ) for 1 hour at 4°C. After washing with the same buffer, cells were incubated with Streptavidin-FITC, FITC-goat anti-mouse IgG, or FITC-goat anti-rabbit IgG for 1 hour at 4°C. After extensive washing with FACS buffer, cells were resuspended in PBS containing 1% paraformaldehyde. Expression was measured on FACS Calibur (Becton-Dickinson, NJ USA) by collecting 10,000 events and analyzed by CellQuest.  
doi:10.1371/journal.pone.0088712.g003

Tris-HCl (pH7.5) containing 1% Triton X-100, 0.14 M NaCl, and protease inhibitors. The lysates were then applied onto a anti-FLAG (M2) antibody-conjugated agarose column, extensively washed with 100 mM Tris-HCl (pH7.5) containing 1% Triton X-100, 1 M NaCl, and protease inhibitors. The bound protein was eluted with 1 M Glycine (pH 2.0) and immediately neutralized with 1M Tris (pH 10). The eluted protein was separated with SDS-PAGE, transferred onto Immobilon-P membrane, and blotted with HRP-conjugated anti-FLAG (M2) antibody to ensure the presence of the fusion protein without degradation.

#### Selection of ssDNA that Bind CD44 Exon v10 Peptide

DNA aptamers that bind to the CD44 exon v10 peptide were isolated using buffer systems as described in [1]. Briefly, 96-well plates were first coated with anti-FLAG (M2) antibody at a concentration of 5  $\mu\text{g}/\text{ml}$  in PBS and then the non-specific binding sites were blocked by incubating with PBS containing 1 mg/ml BSA for 1 hour at room temperature. Plates were washed with PBS and incubated with CD44 exon v10 peptide for 3 hours at room temperature. 5 nmol of the chemically synthesized ssDNA library dissolved in binding buffer (100 mM NaCl, 5 mM  $\text{MgCl}_2$ , pH 7.2) was added (50  $\mu\text{l}/\text{well}$ ) to the wells coated with recombinant CD44 v10 peptide. The plates were incubated for 1 h at 37°C, and extensively washed with wash buffer (150 mM NaCl, 5 mM  $\text{MgCl}_2$ , pH7.2) to remove unbound

ssDNA. The bound ssDNAs were recovered by incubating with 30  $\mu\text{l}/\text{well}$  of elution buffer (1.5 M NaCl, 5 mM  $\text{MgCl}_2$ , pH7.2) for 15 min at room temperature. The recovered ssDNAs (1  $\mu\text{l}$ ) were then amplified by unidirectional PCR in favor of the generation of sense strand with 400 pmole of forward primer (5' - GGGAGACAAGAATAAACGCAA-3') and 4 pmole of reverse primer (5'-GCCTGTTGTGAGCCTCCTGTCGAA-3'). The amplified aptamers were then incubated on the plates coated with CD44 exon v10 peptide as described above. This selection process was repeated 10 times. After the final selection, bound DNA aptamers were amplified by PCR and ligated to pCR2.1-TOPOTA vector for sequencing.

#### FACS Analysis

Expression of integrin subunits was evaluated by FACS analysis according to the methods previously described [27]. Briefly, cells were harvested with PBS containing 5 mM EDTA and immediately neutralized in FACS buffer (RPMI1640 containing 1% BSA and 0.025%  $\text{NaN}_3$ ). Tumor cells ( $10^5$ ) were incubated with 5  $\mu\text{g}/\text{ml}$  of primary antibodies or 5  $\mu\text{g}/\text{ml}$  of biotinylated aptamers by shaking for 1 hour at 4°C. After extensive washing with FACS buffer, cells were incubated with FITC-conjugated secondary antibody (1:1000 dilutions) or FITC-avidin (1:10,000 dilution) by shaking for 1 hour at 4°C. Cells were then washed with FACS buffer 5 to 6 times and fixed in PBS containing 1% para-

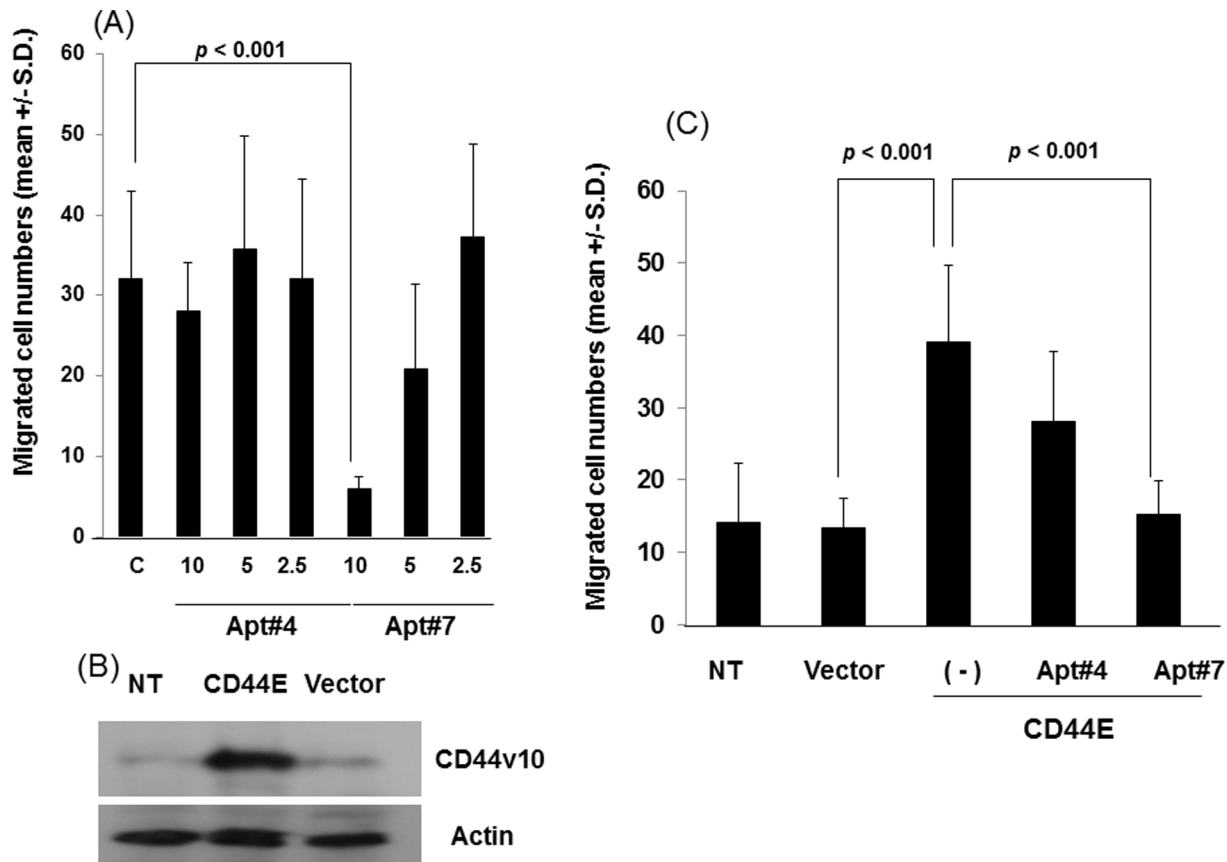

**Figure 4. Inhibition of cell migration by aptamers against CD44 exon v10.** (A) HCC38 cells were harvested, washed and resuspended in RPMI1640-serum free media. Migration assays were performed using type I collagen (10  $\mu$ g/ml) as an adhesive substrate in the lower compartment of Transwell by incubating at 37°C for 4 hours. The aptamers were added in both upper and lower chambers at the indicated concentrations in the text. Experiments were performed in triplicate. Statistical significance was calculated by Student's two-tailed paired *t*-test. (B) MCF-7 cells were stably transfected with CD44E according to the methods described in Materials and Methods. MCF-7 cells transfected control vector, [MCF-7(pIRES2)], MCF-7 (CD44E), and parental MCF-7 cells (NT) were lysed and subjected to western blotting for the expression of CD44E using anti-CD44 exon v10 antibody followed by HRP-conjugated goat-anti-rabbit IgG. The signal was detected by ECL reactions. Actin was used as a loading control. (C) The migration of these cells was evaluated as described above in the presence or absence of aptamers against CD44 exon v10 at a concentration of 10 nM as described above. Experiments were performed in triplicate. Statistical significance was calculated by Student's two-tailed paired *t*-test. doi:10.1371/journal.pone.0088712.g004

fomaldehide. The experimental conditions were optimized by altering the concentration of antibodies, biotinylated aptamers, and Streptavidin-FITC. Expression was measured on FACS Calibur (Becton-Dickinson, NJ USA) by collecting 10,000 events and analyzed by CellQuest.

#### Co-immunoprecipitation Assays

Cells were cultured and washed with PBS briefly to remove serum components [28]. Cells were directly lysed with 100 mM Tris-HCl (pH 7.5) containing 1% Brij35, 0.14 M NaCl, 1 mM CaCl<sub>2</sub>, 1 mM MnCl<sub>2</sub>, and a protease inhibitor cocktail by scraping and pipetting. Cell lysates were centrifuged and the supernatant was precleared with control IgG-conjugated protein G-agarose beads. The precleared cell lysates were immunoprecipitated with anti-CD44 antibody-protein G beads or control IgG-protein G beads for 4 hours at 4°C. The beads were extensively washed and the bound proteins were released by boiling at 95°C in SDS-sample buffer under reducing conditions and separated on SDS-PAGE followed by western blotting with anti-EphA2 antibody followed by HRP-secondary antibody. The proteins are visualized with enhanced chemiluminescence (ECL) reaction.

#### Pull-down Assays

Pull-down assays were performed as described previously [27]. Briefly, cells were cultured in dishes (10 cm diameter) overnight in RPMI1640 containing 10% FBS. Cells were harvested using 5 mM EDTA in PBS and were briefly washed three times with PBS. Cell lysates in 100 mM Tris-HCl (pH 7.5) containing 1% Brij35, 0.14 M NaCl, 1 mM CaCl<sub>2</sub>, 1 mM MnCl<sub>2</sub>, and a protease inhibitor cocktail were centrifuged and the supernatant was precleared with anti-FLAG M2 agarose beads (Sigma) for 4 hours by shaking at 4°C. The cleared lysates were incubated with recombinant protein CD44v10-FLAG-anti-FLAG (M2) antibody-agarose beads in the presence or absence of aptamers (20 nM) by shaking at 4°C for 4 hours. The beads were washed extensively with 100 mM Tris-HCl (pH 7.5) containing 1% Brij35, 0.14 M NaCl, 1 mM CaCl<sub>2</sub>, 1 mM MnCl<sub>2</sub>, and a protease inhibitor cocktail to remove any proteins that nonspecifically bound on the beads. The bound proteins were released by boiling at 95°C in SDS-sample buffer under reducing conditions and separated on SDS-PAGE followed by western blotting with anti-EphA2 antibody followed by HRP-secondary antibody. The proteins are visualized with enhanced chemiluminescence (ECL) reaction.

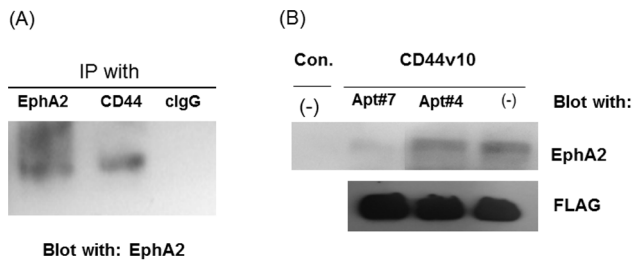

**Figure 5. CD44 associated with EphA2 on breast cancer cells.** (A) HCC38 cells were lysed with 100 mM Tris-HCl (pH 7.5) containing 1% Brij35, 0.14 M NaCl, 1 mM CaCl<sub>2</sub>, 1 mM MnCl<sub>2</sub>, and a protease inhibitor cocktail by scraping and pipetting. The cell lysates were precleared and immunoprecipitated with anti-CD44 antibody clone (clone 156-3C11)-, anti-EphA2- or control IgG-protein G beads for 4 hours at 4°C. The bound proteins were released by boiling at 95°C in SDS-sample buffer under reducing conditions and separated on SDS-PAGE followed by western blotting with anti-EphA2 antibody followed by HRP-secondary antibody. The proteins are visualized with enhanced chemiluminescence (ECL) reaction. (B) Cells were harvested using 5 mM EDTA in PBS and were lysed in 100 mM Tris-HCl (pH 7.5) containing 1% Brij35, 0.14 M NaCl, 1 mM CaCl<sub>2</sub>, 1 mM MnCl<sub>2</sub>, and a protease inhibitor cocktail. The lysates were precleared with anti-FLAG (M2) agarose beads for 4 hours by shaking at 4°C. The cleared lysates were incubated with recombinant protein CD44v10 P-FLAG-anti-FLAG (M2) antibody-agarose beads (CD44v10) or anti-FLAG (M2) antibody-agarose beads (Con.) in the presence or absence of aptamers (Apt#4 and Apt#7) by shaking at 4°C for 4 hours. The beads were washed extensively with the lysis buffer. The bound proteins were released by boiling at 95°C in SDS-sample buffer under reducing conditions and separated on SDS-PAGE followed by western blotting with anti-EphA2 followed by HRP-secondary antibody or HRP-conjugated anti-FLAG (M2) antibody. The proteins are visualized with enhanced chemiluminescence (ECL) reaction. CD44 exon v10 peptide was used as a loading control for ensuring the same amount of proteins was loaded in each lane. doi:10.1371/journal.pone.0088712.g005

### Statistical Analysis

Two-tailed (paired) Student's *t*-test was used to calculate statistical significance between control and experimental groups. A *p* value of less than 0.001 is considered as significant difference between the groups.

## Results

### Exon v10 of CD44 Regulated Triple-negative Breast Cancer Migration

Enhanced migration is one of the key features of malignant tumor phenotypes. Tumor cells must migrate into connective tissues in order to disseminate from primary tumor for establishing metastasis. Previous studies demonstrated that antibodies against CD44 exon v10 inhibited leukocytes migration to inflammation sites and homing to bone marrow, suggesting that this exon plays a key role in regulating the processes of cell adhesion and migration [22,23,24]. To determine if CD44 exon v10 was involved in tumor cell migration, we tested anti-CD44 v10 antibody for its ability to inhibit migration of triple-negative (TN) breast cancer cells, HCC38. Under our experimental conditions, anti-CD44v10 antibody, but not the control antibody, significantly inhibited tumor migration towards type I collagen (Figure 1A), suggesting that this exon regulates TN breast cancer migration. In order to test if the decreased migration was due to the inhibition of cell adhesion to type I collagen, cells were pre-incubated with control IgG or anti-CD44 exon v10 antibody. In contrast to cell migration, the anti-CD44 exon v10 antibody did not affect cell adhesion (Figure 1B). Consistent with our previous studies [25],

TN breast cancer adhesion and migration to type I collagen were significantly inhibited by anti- $\alpha$ 2 integrin antibody (Figures 1A and 1B). Since HCC38 cell adhesion to type I collagen is mediated by  $\alpha$ 2 $\beta$ 1 integrin these results suggest that CD44 exon v10 is not involved in cell adhesion; it rather functions in post-adhesion processes such as regulating signaling pathways.

### Selection of DNA Aptamers that Bind CD44 Exon v10 Peptide

In order to establish screening systems to isolate target specific DNA aptamers, we expressed exon v10 as a recombinant fusion protein with FLAG using pFLAG-CTC in *E. coli* DE3(BL21) Plys according to methods described in materials and methods. The expressed FLAG-CD44 v10 was immobilized on anti-FLAG (M2) antibody-coated plates and non specific binding sites were blocked by incubating with PBS-BSA, which served as a matrix to isolate and purify DNA aptamers that bind to exon v10 (Figure 2). The first synthetic ssDNA library was generated by 25 random nucleotides flanked by 5'-fixed oligonucleotides (GGGAGACAA-GAATAAACGCAA) and 3'-fixed oligonucleotides (TTCGACAGGAGGCTCACAAACAGGC) as described previously [1,12]. This size ( $4^{25} = \sim 10^{15}$ ) was selected because it has been reported as the theoretical minima to obtain full library diversity and allow formation of all secondary structures known for ssDNA oligonucleotides as described previously [1].

ssDNA library dissolved in binding buffer was incubated on the plates coated with CD44 exon v10 peptide for 1 h at 37°C. After extensive washing of the plates with wash buffer, ssDNA that bound to the target molecule were recovered by incubating with dissociation buffer. The recovered ssDNA were amplified by unidirectional PCR reactions to enrich sense ssDNA and then incubated on the plates coated with recombinant CD44 exon v10 as described above. We repeated this selection cycle 10 times. At the end of the final cycle of the selection, aptamers that bind to CD44 exon v10 of were isolated, amplified by PCR, and ligated into pCR2.1-TOPO<sup>TA</sup> vector for sequencing.

### Characterization of Exon v10 Aptamers by FACS Analysis

In order to further characterize the selected aptamers for recognizing CD44 expressed on HCC38 cells, the 5'-terminal of each aptamer was conjugated to biotin and then incubated with cells followed by incubation with FITC-avidin. The binding of the aptamers on cell surface was analyzed on FACSAnalibur. We isolated two aptamers, Apt#4 (GGGAGACAAGAATAAACGCAA CTC CCA GCC CCT CAC GTC AGC CCG C TTCGACAGGAGGCTCACAAACAGGC) and Apt#7 (GGGAGACAAGAATAAACGCAA CCG CGA ACC CCC CCC CTT AAT GTC A TTCGACAGGAGGCTCACAAACAGGC) that recognized HCC38 cells expressing CD44 (Figure 3A). Although nearly all cells were positive to anti-panCD44 antibody (156-3C11), only a fraction of cells were stained with anti-CD44 v10 antibody (Figure 3A), suggesting HCC38 cells express various isoforms of CD44 and exon v10. This notion was consistent with the recent studies demonstrating that cultured human breast cancer cells shows heterogeneity of the expression of various isoforms of CD44 [29]. Under our experimental conditions, Apt#4 and Apt#7 stained around 50% of HCC38 cells (Figure 3A). In order to further test the specificities of aptamers, SK-Br-3 cells, which express low level of endogenous CD44 molecules [30], were incubated with Apt#4 and Apt#7 followed by FITC-avidin. None of the aptamers stained SK-Br-3 cells (Figure 3B), suggesting that the DNA aptamers recognize CD44 exon v10 on the tumor cell surface of HCC38 cells.

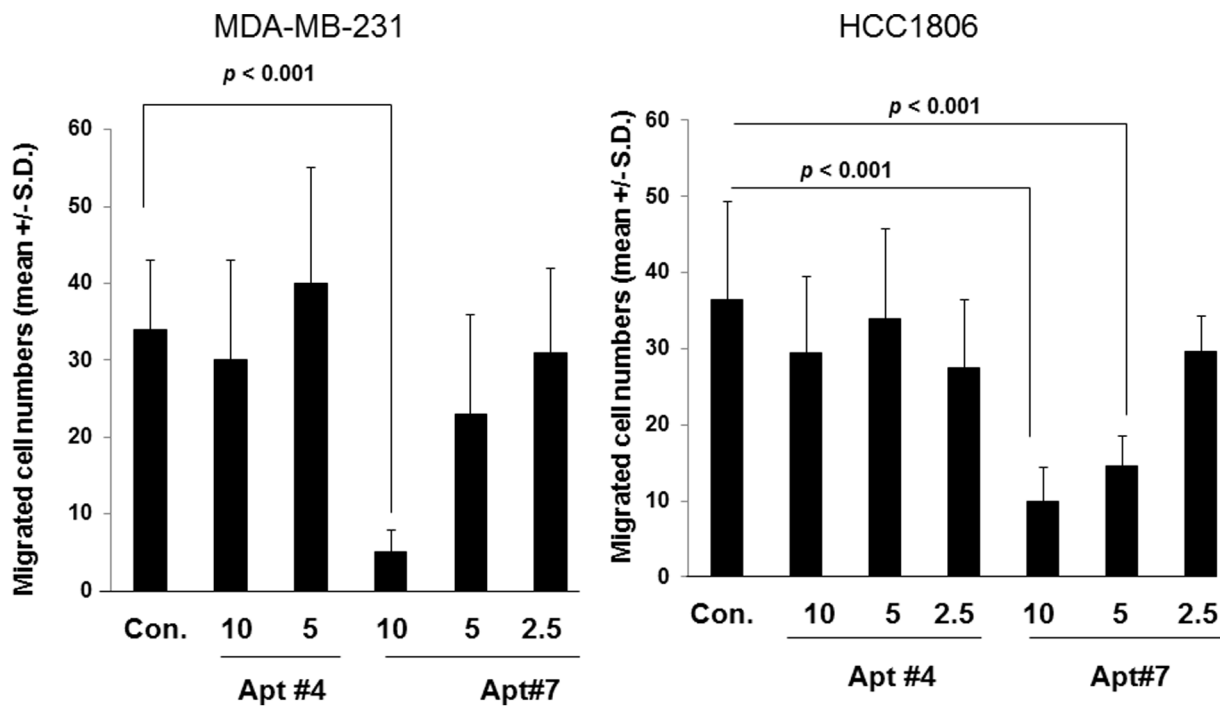

**Figure 6. Inhibition of migration of MDA-MB-231 and HCC1806.** MDA-MB-231 (A) or HCC1806 (B) cells were harvested, washed and resuspended in RPMI1640-serum free media. Migration assays were performed using type I collagen (10  $\mu$ g/ml) as an adhesive substrate in the lower compartment of Transwell by incubating at 37°C for 4 hours. The aptamers were added in both upper and lower chambers at the indicated concentrations. Experiments were performed in triplicate. Statistical significance was calculated by Student's two-tailed paired *t*-test. doi:10.1371/journal.pone.0088712.g006

#### Inhibition of Tumor Migration by Aptamers for Exon v10 of CD44

We then evaluated Apt#4 and Apt#7 for their ability to inhibit tumor migration toward type I collagen as described in the Materials and Methods section. Apt#7 inhibited tumor migration in a concentration dependent manner and significant inhibition was observed at a concentration of 10 nM (Figure 4A), of which concentration was similar to that DNA aptamers to inhibit breast cancer migration [7]. However, Apt#4 failed to inhibit migration despite the fact that this aptamer recognizes HCC38 cell surface (Figure 4A). Thus, we utilized Apt#4 as a negative control for Apt#7 in the following studies.

In order to further test the ability of aptamers to inhibit migration of breast cancer cells, we generated a stable transfectant of CD44E using MCF-7 as a parental cell line. Although MCF-7 expressed CD44 harboring exon v10 as previously reported [31], transfection of CD44E cDNA augmented the expression of the exon as demonstrated by western blotting (Figure 4B). Previous studies demonstrated that transfection of CD44 variant that harbor exon v10 into MCF-7 also augmented migration [19]. Consistent with these results, overexpression of CD44E in MCF-7 significantly enhanced migration to type I collagen (Figure 4B). Importantly, Apt#7 but not Apt#4 significantly inhibited the enhanced migration at a concentration of 10 nM (Figure 4C), which was an optimized concentration in Figure 4A. These results further support a notion of CD44E as a migration-promoting molecule and the aptamers against CD44 exon v10 also functioned as an inhibitor for migration of CD44E-overexpressing cells.

#### Association of EphA2 with CD44 on HCC38 Breast Cancer Cells

Since exon v10 localizes in the ectodomain of CD44 and reagents such as antibodies and DNA aptamers inhibited migration of HCC38 cells, we hypothesized that CD44 forms a molecular complex with other cell surface molecules which promotes migration of TN breast cancer cells. In order to identify molecules associated with CD44, we performed co-immunoprecipitation studies in HCC38 cells. Cell lysates were immunoprecipitated with control IgG or anti-CD44 antibody (clone 156-3C11), and the precipitates were separated on SDS-PAGE. The membranes were blotted with antibodies against various cell surface molecules, and we identified EphA2 as one of the molecules that associates with CD44 (Figure 5A). In order to test whether exon v10 of CD44 is directly associated with EphA2, we performed pull-down assays using the recombinant fragment of CD44 exonv10 as a matrix. Under our experimental conditions, EphA2 was precipitated with the recombinant fragment (Figure 5B), suggesting that EphA2 associates with CD44 exon v10. Importantly, this association was prevented in the presence of inhibitory aptamer Apt#7 but not with non-inhibitory aptamer Apt#4 (Figure 5B). Given the fact that EphA2 regulates tumor cell migration and invasion [32,33,34], our results suggest that it forms a molecular complex with CD44 through exon v10 and this promotes TN breast cancer migration. Thus destruction of the interaction using DNA aptamers against the exon would inhibit these processes.

We also tested these aptamers for inhibiting cell migration in other cell lines, MDA-MB-231 and HCC1806 cells, which have demonstrated to express EphA2, and we confirmed the expression by western blotting analysis (not shown) [35,36]. Migration of both MDA-MB-231 and HCC1806 cells toward type I collagen was

inhibited in the presence of Apt#7 in a concentration-dependent manner, however Apt#4 did not inhibit migration at any concentrations (Figure 6A and Figure 6B), consistent with the previous results (Figure 4A). These results suggest that Apt#7 would inhibit cell migration expressing CD44 exon v10 and EphA2 by preventing the association of these molecules on cancer cell surface.

## Discussion

Recent studies suggest that breast cancer cells express various CD44 isoforms [29]. For example, Luminal A breast cancer cells show significantly higher expression of CD44v2-v10 and v3-v10 isoforms compared to other subtypes, and basal-normal-type breast cancer cells express CD44E isoforms [29]. Pathological studies showed that the expression of specific exons such as v3, v6, and v9 isoforms is correlated with breast cancer progression [37,38]. Recent studies demonstrated that hypoxia regulates specific variants (i.e. v6 and v7/8) of CD44 through HIF-1 $\alpha$  in triple-negative breast cancer cells [39]. Although the details of the functions of each exon in breast cancer biology are not clear, these results suggest that the functional diversity of CD44 would be due to the structural diversity of the molecule as a result of splicing by tumor-host microenvironments. We demonstrated that EphA2 was co-precipitated with CD44 and was pulled down by exon10 peptide-conjugated beads, suggesting that CD44 forms a molecular complex with EphA2 through exon v10 on breast cancer cell surface. EphA2 is a receptor tyrosine kinase for Ephrin1 and plays a key role in promoting progression and metastasis of various tumor cells including breast cancer [34,40,41,42]. Our results suggest a novel model of molecular complex consisting of CD44 and EphA2 that promote of tumor progression and metastasis. However, there are still questions regarding the mechanisms of the formation of the molecular complex; whether the complex is performed on the cell surface or the ECM-ligand induces the formation on the cancer cell surface, which is a key question for understanding the signaling pathways that promote cell migration.

Aptamers have been demonstrated as alternatives to antibody-based diagnosis, research tools, diagnosis, and therapies [43]. We developed an aptamer, Apt#7, as a potent inhibitor for migration of various breast cancer cells including HCC38, HCC1806, and MDA-MB-231. Significant inhibition was observed at 5–10 nM of Apt#7 dependent on cell types, a concentration that is comparable for that of DNA aptamers against osteopontin to inhibit migration, invasion, as well as tyrosine kinase signaling pathways

[7]. The fact that the association of EphA2 and CD44 exon v10 was not observed in the presence of Apt#7 suggest that one of the mechanisms would be that this aptamer prevents the association of the molecular complex consisting of CD44 and EphA2 on cancer cell surface. Despite the fact that both Apt#7 and Apt#4 recognized HCC38 cell surface, Apt#4 failed to show any inhibitory activities in migration and CD44 exon v10 interaction with EphA2. Although the reasons to explain the inactivity of Apt#4 are not clear, it is possible that Apt#7 and Apt#4 would bind distinct site of CD44 exon v10 peptide. The ability of these aptamers to recognize amino acid residues in CD44 exon v10 would be particularly valuable where antibodies cannot recognize. Indeed, previous studies demonstrated the efficacy of mutation analysis of target proteins to identify specific aptamer binding sites [44,45]. It is expected that the identification of Apt#4 and Apt#7 would provide significant information to characterize the nature of the interaction between CD44 exon v10 and EphA2. Since we cannot exclude the possibility that the affinity of Apt#4 to CD44 exon v10 would be lower compared to that of Apt#7, we are evaluating dissociation constants between these aptamers and CD44 exon v10 peptide and its mutants.

In this study, we developed DNA aptamer that bind to CD44 exon v10 and demonstrated the potential role for CD44-EphA2 complex to promote breast cancer migration. Recent studies by Gorenstein and colleagues developed DNA aptamer against hyaluronan (HA) binding site (HABD) of CD44 and demonstrated the efficacy to inhibit the interaction of HA to CD44 [46]. Given the fact that HCC38, MDA-MB-231, and HCC1806 are classified in distinct subtypes of TN breast cancer cells [47], the results of inhibition of migration by attenuating CD44 exon v10 function may lead to a promising approach for inhibiting tumor progression and metastasis of any TN breast cancer cell types.

## Acknowledgments

The authors thank Mrs. Sue Lubert for sequencing the DNA. The opinion and assertions contained herein are the private views of the authors and are not to be construed as official or as representing the views of the Department of the Army or the Department of Defense.

## Author Contributions

Conceived and designed the experiments: JI RS SS MLC. Performed the experiments: RC JD. Analyzed the data: JI RC JD RS SS. Wrote the paper: JI RC RS RJM MLC CDS.

## References

1. Ferreira CS, Matthews CS, Missailidis S (2006) DNA aptamers that bind to MUC1 tumour marker: design and characterization of MUC1-binding single-stranded DNA aptamers. *Tumour Biol* 27: 289–301.
2. Fitzwater T, Polisky B (1996) A SELEX primer. *Methods Enzymol* 267: 275–301.
3. Lupold SE, Hicke BJ, Lin Y, Coffey DS (2002) Identification and characterization of nuclease-stabilized RNA molecules that bind human prostate cancer cells via the prostate-specific membrane antigen. *Cancer Res* 62: 4029–4033.
4. Kimoto M, Shirouzu M, Mizutani S, Koide H, Kaziro Y, et al. (2002) Anti-(Raf-1) RNA aptamers that inhibit Ras-induced Raf-1 activation. *Eur J Biochem* 269: 697–704.
5. Daniels DA, Chen H, Hicke BJ, Swiderek KM, Gold L (2003) A tenascin-C aptamer identified by tumor cell SELEX: systematic evolution of ligands by exponential enrichment. *Proc Natl Acad Sci U S A* 100: 15416–15421.
6. Hicke BJ, Marion C, Chang YF, Gould T, Lynott CK, et al. (2001) Tenascin-C aptamers are generated using tumor cells and purified protein. *J Biol Chem* 276: 48644–48654.
7. Mi Z, Guo H, Russell MB, Liu Y, Sullenger BA, et al. (2009) RNA aptamer blockade of osteopontin inhibits growth and metastasis of MDA-MB231 breast cancer cells. *Mol Ther* 17: 153–161.
8. Ahmad KM, Oh SS, Kim S, McClellan FM, Xiao Y, et al. (2011) Probing the limits of aptamer affinity with a microfluidic SELEX platform. *PLoS One* 6: e27051.
9. Li N, Nguyen HH, Byrom M, Ellington AD (2011) Inhibition of cell proliferation by an anti-EGFR aptamer. *PLoS One* 6: e20299.
10. Jeong S, Han SR, Lee YJ, Kim JH, Lee SW (2010) Identification of RNA aptamer specific to mutant KRAS protein. *Oligonucleotides* 20: 155–161.
11. Borbas KE, Ferreira CS, Perkins A, Bruce JI, Missailidis S (2007) Design and synthesis of mono- and multimeric targeted radiopharmaceuticals based on novel cyclen ligands coupled to anti-MUC1 aptamers for the diagnostic imaging and targeted radiotherapy of cancer. *Bioconjug Chem* 18: 1205–1212.
12. Ferreira CS, Papamichael K, Guilbault G, Schwarzacher T, Garipey J, et al. (2008) DNA aptamers against the MUC1 tumour marker: design of aptamer-antibody sandwich ELISA for the early diagnosis of epithelial tumours. *Anal Bioanal Chem* 390: 1039–1050.
13. Pieve CD, Perkins AC, Missailidis S (2009) Anti-MUC1 aptamers: radiolabelling with (99 m) Tc and biodistribution in MCF-7 tumour-bearing mice. *Nucl Med Biol* 36: 703–710.
14. Bell C, Lynam E, Landfair DJ, Janjic N, Wiles ME (1999) Oligonucleotide NX1838 inhibits VEGF165-mediated cellular responses in vitro. *In Vitro Cell Dev Biol Anim* 35: 533–542.



15. Carrasquillo KG, Ricker JA, Rigas IK, Miller JW, Gragoudas ES, et al. (2003) Controlled delivery of the anti-VEGF aptamer EYE001 with poly (lactic-co-glycolic) acid microspheres. *Invest Ophthalmol Vis Sci* 44: 290–299.
16. Gragoudas ES, Adams AP, Cunningham ET, Jr., Feinsod M, Guyer DR (2004) Pegaptanib for neovascular age-related macular degeneration. *N Engl J Med* 351: 2805–2816.
17. Rosenberg JE, Bambury RM, Van Allen EM, Drabkin HA, Lara PN, Jr., et al. (2013) A phase II trial of AS1411 (a novel nucleolin-targeted DNA aptamer) in metastatic renal cell carcinoma. *Invest New Drugs*.
18. Naor D, Sionov RV, Ish-Shalom D (1997) CD44: structure, function, and association with the malignant process. *Adv Cancer Res* 71: 241–319.
19. Iida N, Bourguignon LY (1995) New CD44 splice variants associated with human breast cancers. *J Cell Physiol* 162: 127–133.
20. Iida N, Bourguignon LY (1997) Coexpression of CD44 variant (v10/ex14) and CD44S in human mammary epithelial cells promotes tumorigenesis. *J Cell Physiol* 171: 152–160.
21. Kan M, Aki M, Akiyama K, Naruo S, Kanayama H, et al. (1995) High-level expression of the CD44 variant sharing exon v10 in renal cancer. *Jpn J Cancer Res* 86: 847–853.
22. Freyschmidt-Paul P, Seiter S, Zoller M, König A, Ziegler A, et al. (2000) Treatment with an anti-CD44v10-specific antibody inhibits the onset of alopecia areata in C3H/HeJ mice. *J Invest Dermatol* 115: 653–657.
23. Rosel M, Khaldoyanidi S, Zawadzki V, Zoller M (1999) Involvement of CD44 variant isoform v10 in progenitor cell adhesion and maturation. *Exp Hematol* 27: 698–711.
24. Zoller M, Gupta P, Marhaba R, Vitacolonna M, Freyschmidt-Paul P (2007) Anti-CD44-mediated blockade of leukocyte migration in skin-associated immune diseases. *J Leukoc Biol* 82: 57–71.
25. Iida J, Dorchak J, Lehman JR, Clancy R, Luo C, et al. (2012) FH535 inhibited migration and growth of breast cancer cells. *PLoS One* 7: e44418.
26. Iida J, Wilhelmson KL, Ng J, Lee P, Morrison C, et al. (2007) Cell surface chondroitin sulfate glycosaminoglycan in melanoma: role in the activation of pro-MMP-2 (pro-gelatinase A). *Biochem J* 403: 553–563.
27. Iida J, Pei D, Kang T, Simpson MA, Herlyn M, et al. (2001) Melanoma chondroitin sulfate proteoglycan regulates matrix metalloproteinase-dependent human melanoma invasion into type I collagen. *J Biol Chem* 276: 18786–18794.
28. Eisenmann KM, McCarthy JB, Simpson MA, Keely PJ, Guan JL, et al. (1999) Melanoma chondroitin sulphate proteoglycan regulates cell spreading through Cdc42, Ack-1 and p130cas. *Nat Cell Biol* 1: 507–513.
29. Olsson E, Honeth G, Bendahl PO, Saal LH, Gruvberger-Saal S, et al. (2011) CD44 isoforms are heterogeneously expressed in breast cancer and correlate with tumor subtypes and cancer stem cell markers. *BMC Cancer* 11: 418.
30. Murohashi M, Hinohara K, Kuroda M, Isagawa T, Tsuji S, et al. (2010) Gene set enrichment analysis provides insight into novel signalling pathways in breast cancer stem cells. *Br J Cancer* 102: 206–212.
31. Kalish ED, Iida N, Moffat FL, Bourguignon LY (1999) A new CD44V3-containing isoform is involved in tumor cell growth and migration during human breast carcinoma progression. *Front Biosci* 4: A1–8.
32. Holm R, de Putte GV, Suo Z, Lie AK, Kristensen GB (2008) Expressions of EphA2 and EphrinA-1 in early squamous cell cervical carcinomas and their relation to prognosis. *Int J Med Sci* 5: 121–126.
33. Petty A, Myshkin E, Qin H, Guo H, Miao H, et al. (2012) A small molecule agonist of EphA2 receptor tyrosine kinase inhibits tumor cell migration in vitro and prostate cancer metastasis in vivo. *PLoS One* 7: e42120.
34. Tandon M, Vemula SV, Mittal SK (2011) Emerging strategies for EphA2 receptor targeting for cancer therapeutics. *Expert Opin Ther Targets* 15: 31–51.
35. Huang F, Reeves K, Han X, Fairchild C, Platero S, et al. (2007) Identification of candidate molecular markers predicting sensitivity in solid tumors to dasatinib: rationale for patient selection. *Cancer Res* 67: 2226–2238.
36. Noblitt LW, Bangari DS, Shukla S, Knapp DW, Mohammed S, et al. (2004) Decreased tumorigenic potential of EphA2-overexpressing breast cancer cells following treatment with adenoviral vectors that express EphrinA1. *Cancer Gene Ther* 11: 757–766.
37. Berner HS, Nesland JM (2001) Expression of CD44 isoforms in infiltrating lobular carcinoma of the breast. *Breast Cancer Res Treat* 65: 23–29.
38. Saleh F, Reno W (2008) Invasive cribriform breast carcinomas in patients with grade I and stage IIA (T2 N0 M0) breast cancer strongly express the v3 and v6, but not the v4 isoforms of the metastatic marker CD44. *Neoplasia* 55: 246–255.
39. Krishnamachary B, Penet MF, Nimmagadda S, Mironchik Y, Raman V, et al. (2012) Hypoxia regulates CD44 and its variant isoforms through HIF-1 $\alpha$  in triple negative breast cancer. *PLoS One* 7: e44078.
40. Fox BP, Kandpal RP (2004) Invasiveness of breast carcinoma cells and transcript profile: Eph receptors and ephrin ligands as molecular markers of potential diagnostic and prognostic application. *Biochem Biophys Res Commun* 318: 882–892.
41. Nakamoto M, Bergemann AD (2002) Diverse roles for the Eph family of receptor tyrosine kinases in carcinogenesis. *Microsc Res Tech* 59: 58–67.
42. Pasquale EB (2010) Eph receptors and ephrins in cancer: bidirectional signalling and beyond. *Nat Rev Cancer* 10: 165–180.
43. Famulok M, Hartig JS, Mayer G (2007) Functional aptamers and aptazymes in biotechnology, diagnostics, and therapy. *Chem Rev* 107: 3715–3743.
44. Weiss S, Proské D, Neumann M, Groschup MH, Kretzschmar HA, et al. (1997) RNA aptamers specifically interact with the prion protein PrP. *J Virol* 71: 8790–8797.
45. Xu W, Ellington AD (1996) Anti-peptide aptamers recognize amino acid sequence and bind a protein epitope. *Proc Natl Acad Sci U S A* 93: 7475–7480.
46. Somasunderam A, Thivyanathan V, Tanaka T, Li X, Neerathilingam M, et al. (2010) Combinatorial selection of DNA thioaptamers targeted to the HA binding domain of human CD44. *Biochemistry* 49: 9106–9112.
47. Lehmann BD, Bauer JA, Chen X, Sanders ME, Chakravarthy AB, et al. (2011) Identification of human triple-negative breast cancer subtypes and preclinical models for selection of targeted therapies. *J Clin Invest* 121: 2750–2767.
